# Supplementary material for: Antitumor efficacy of XPO1 inhibitor Selinexor in KRAS-mutant lung adenocarcinoma patient-derived xenografts
Source: PubMed Central journal article supplement — Transl Oncol. 2021 Jul 17;14(10):101179. doi: 10.1016/j.tranon.2021.101179 (PMC8313753; doi:10.1016/j.tranon.2021.101179), 2021-07-17
Supplement: mmc1.pdf [file mmc1.pdf]

## Supplementary Figures

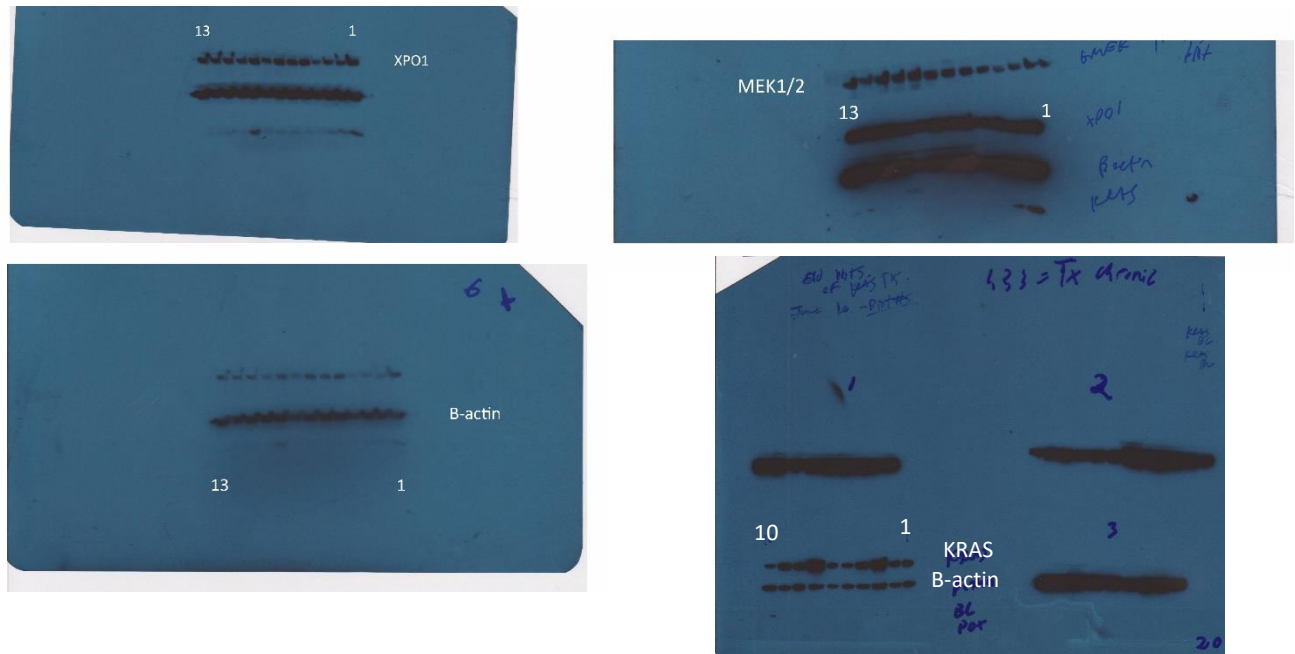

**Supplementary Figure S1. Raw western blots.** Raw scanned blots used to create Figure 1B. The numbers refer to the samples loaded.

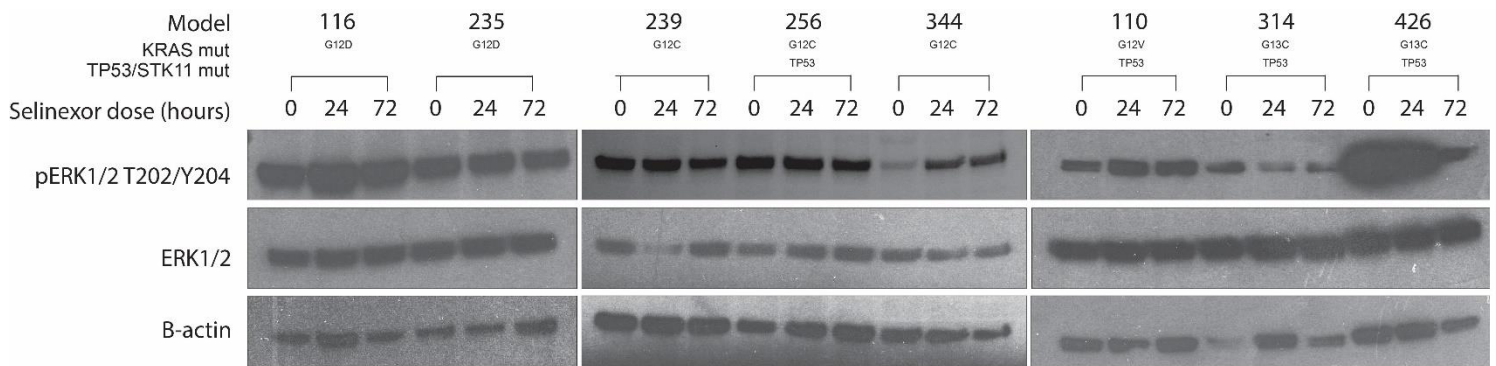

**Supplementary Figure S2. Acute Selinexor treatment effects.** 8 of 10 *KRAS*-mutant PDX were treated with one dose of Selinexor and tumors harvested at 0, 24, 72 hours. pERK1/2, ERK1/2 were probed, and  $\beta$ -Actin was used as a loading control.

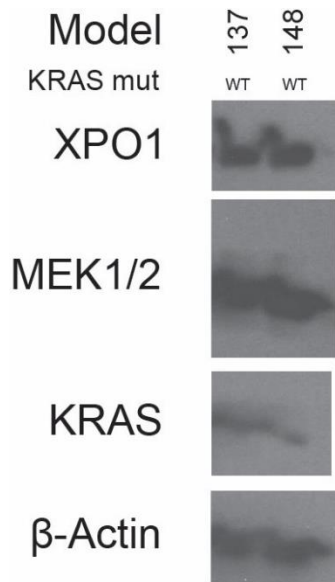

**Supplementary Figure S3. Baseline expression of *KRAS*<sup>WT</sup> models.** Tumors were harvested at baseline and probed for XPO1, MEK1/2, and KRAS.  $\beta$ -Actin was used as a loading control.
